# Supplementary material for: Porous poly-l-lactide-co-ɛ-caprolactone scaffold: a novel biomaterial for vaginal tissue engineering
Source: R Soc Open Sci. 2018 Aug 15;5(8):180811. doi: 10.1098/rsos.180811 (PMC6124079; doi:10.1098/rsos.180811)
Supplement: Medium composition testing with live/dead staining [file rsos180811supp1.doc]

**Electronical supplementary material**

**Porous poly-l-lactide-co--caprolactone scaffold: a novel biomaterial for vaginal tissue engineering**

Reetta Sartoneva1,2*, Kirsi Kuismanen2,3,4*, Miia Juntunen1,2, Sanna Karjalainen5, Markus Hannula6, Laura Kyllönen1,2, Jari Hyttinen6, Heini Huhtala7, Kaarlo Paakinaho5, Susanna Miettinen1,2

1Adult Stem Cell Research Group, BioMediTech, Faculty of Medicine and Life Sciences, University of Tampere, Tampere, Finland

2Science Centre, Tampere University Hospital, Tampere, Finland

3Department of Obstetrics and Gynaecology, Tampere University Hospital, Tampere, Finland

4Faculty of Medicine and Life Sciences, University of Tampere, Tampere, Finland

5Biomaterials and Tissue Engineering Group, BioMediTech, Faculty of Biomedical Sciences and Engineering, Tampere University of Technology, Tampere, Finland

6Computational Biophysics and Imaging Group, BioMediTech, Faculty of Biomedical Sciences and Engineering, Tampere University of Technology, Tampere, Finland

7Faculty of Social Sciences, University of Tampere, Tampere, Finland

* Equal contribution

Corresponding author: Reetta Sartoneva, MD, PhD, MSc

University of Tampere, BioMediTech

Arvo Ylpönkatu 34, 4th floor, 33520 Tampere, Finland

Email: reetta.sartoneva@fimnet.fi

Phone: +358 40 024 5371

**Figure S1**

**
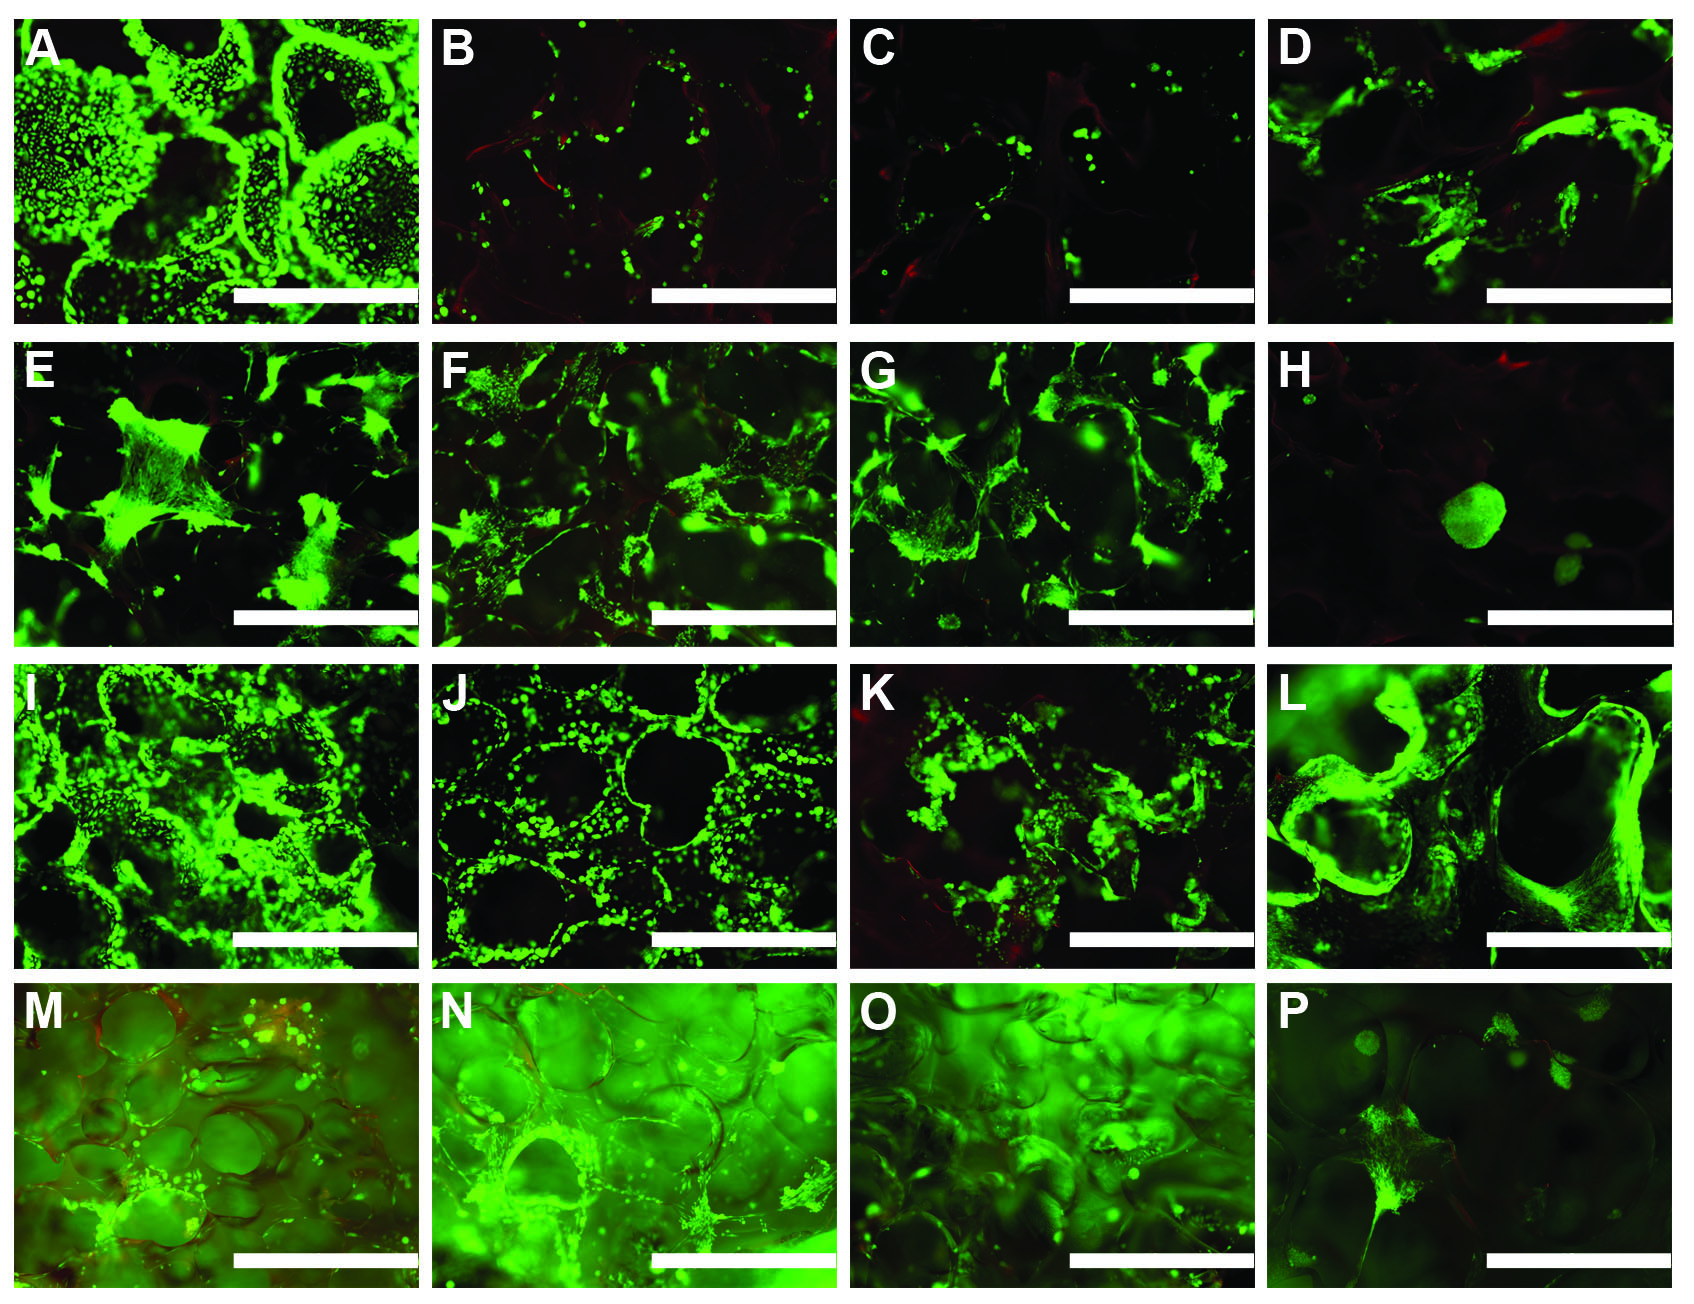
**

Figure S1: Medium testing live/dead images at day 7. The epithelial cells (A-D), stromal cells (E-H) and their co-cultures (I-P) were cultured in different medium compositions; EpiLife (A,I,M) or 5% HS in DMEM/F12 (E),  3 % HS in EpiLife (B,F,J,N), EpiLife  and  BM  1:1 (C,G,K,O) and CnT prime CC (D,H,L,P). Scale bar 1 mm.
